# Supplementary material for: Synthesis, Characterization, Antimicrobial and Antiproliferative Activity Evaluation of Cu(II), Co(II), Zn(II), Ni(II) and Pt(II) Complexes with Isoniazid-Derived Compound
Source: PubMed Central journal article supplement (PMC6154339; doi:10.3390/molecules22040650), 2017-04-19
Supplement: molecules-22-00650-s002.pdf [file molecules-22-00650-s002.pdf]

# Supplementary information: Synthesis, Characterization, Antimicrobial and Antiproliferative Activity Evaluation of Cu(II), Co(II), Zn(II), Ni(II) and Pt(II) Complexes with Isoniazid-Derived Compound

Elena Pahontu \*, Diana-Carolina Ilies \*, Sergiu Shova, Camelia Oprean, Virgil Paunescu, Octavian Tudorel Olaru, Flavian Stefan Radulescu, Aurelian Gulea, Tudor Rosu, Doina Draganescu

Table S1. Crystal data and summary of intensity data collection and structure refinement for HL

| Compound                                           | HL                                                            |
|----------------------------------------------------|---------------------------------------------------------------|
| Empirical formula                                  | C <sub>14</sub> H <sub>13</sub> N <sub>3</sub> O <sub>3</sub> |
| Formula weight                                     | 271.27                                                        |
| Temperature (K)                                    | 200                                                           |
| Crystal system                                     | monoclinic                                                    |
| Space group                                        | P2 <sub>1</sub> /n                                            |
| a (Å)                                              | 7.5757(5)                                                     |
| b (Å)                                              | 16.2389(7)                                                    |
| c (Å)                                              | 10.8065(7)                                                    |
| α (°)                                              | 90                                                            |
| β (°)                                              | 109.973(6)                                                    |
| γ (°)                                              | 90                                                            |
| V (Å <sup>3</sup> )                                | 1249.46(13)                                                   |
| Z                                                  | 4                                                             |
| D <sub>calc.</sub> (g/cm <sup>3</sup> )            | 1.442                                                         |
| μ (mm <sup>-1</sup> )                              | 0.104                                                         |
| F(000)                                             | 568.0                                                         |
| Crystal size (mm)                                  | 0.45 × 0.2 × 0.2                                              |
| θ <sub>min</sub> , θ <sub>max</sub> (°)            | 4.73 to 50.052                                                |
|                                                    | -9 ≤ h ≤ 8                                                    |
| Limiting indices                                   | -19 ≤ k ≤ 18                                                  |
|                                                    | -12 ≤ l ≤ 12                                                  |
|                                                    | 6626 / 2197                                                   |
| Reflections collected / unique                     | [R(int) = 0.0242]                                             |
| Data/restraints/parameters                         | 2197/0/183                                                    |
| Goodness-of-fit on F <sup>2</sup>                  | 1.064                                                         |
| Final R <sub>1</sub> , wR <sub>2</sub> [I > 2σ(I)] | 0.0397, 0.0941                                                |
| R <sub>1</sub> , wR <sub>2</sub> (all data)        | 0.0514, 0.1020                                                |
| Largest diff. peak/ hole (eÅ <sup>-3</sup> )       | 0.20/-0.22                                                    |

Table S2. FAB mass spectral data of complexes 1 - 8.

| Molecular formula                              | Mw (g/mol) | Molecular ion peak [M] <sup>+</sup> | The peaks due to complex fragmentation |       |       |       |
|------------------------------------------------|------------|-------------------------------------|----------------------------------------|-------|-------|-------|
| [Cu(L)(Cl)]·2H <sub>2</sub> O (1)              | 405        | 407.1                               | 218.2                                  | 249.9 | 302.3 | 388.1 |
| [Cu(L)(CH <sub>3</sub> COO)] (2)               | 392.5      | 394.9                               | 219.0                                  | 302.3 | 333.1 | 356.5 |
| [Cu(L)(NO <sub>3</sub> )·H <sub>2</sub> O (3)  | 413.5      | 411.1                               | 195.0                                  | 241.0 | 302.4 | 333.1 |
| [Cu(L)(ClO <sub>4</sub> )·H <sub>2</sub> O (4) | 451        | 452.2                               | 225.2                                  | 302.3 | 321.5 | 352.2 |
| [Co(L) <sub>2</sub> ] (5)                      | 599        | 604.0                               | 333.1                                  | 452.1 | 512.5 | 568.6 |
| [Zn(L) <sub>2</sub> ] (6)                      | 605.4      | 605.1                               | 195.1                                  | 218.2 | 374.0 | 567.2 |
| [Ni(L)(Cl)] (7)                                | 364.2      | 365.1                               | 232.7                                  | 251.0 | 296.9 | 343.9 |
| [Pt(L)(Cl)] (8)                                | 500.5      | 501.2                               | 241.0                                  | 294.1 | 330.5 | 452.1 |

**Table S3.** Cell viability of the MCF-7, SKBR-3, A375 and NCI-H1573 cancer cells after 48 hours treatment with **HL** and the complexes.

|           |             | HL    | 1     | 2    | 3     | 4     | 5     | 6     | 7     | 8     | DMSO   | Py    | Control |
|-----------|-------------|-------|-------|------|-------|-------|-------|-------|-------|-------|--------|-------|---------|
| MCF-7     | Viability % | 21.53 | 2.47  | 2.10 | 2.44  | 3.43  | 55.61 | 17.72 | 47.75 | 21.71 | 77.79  | 74.39 | 100.00  |
|           | STD         | 1.83  | 0.70  | 0.65 | 1.06  | 1.57  | 6.57  | 1.01  | 5.19  | 2.37  | 2.89   | 8.87  | 0.20    |
| SKBR-3    | Viability % | 76.26 | 25.24 | 6.88 | 62.65 | 48.72 | 76.68 | 61.43 | 21.11 | 85.27 | 78.90  | 77.51 | 100.00  |
|           | STD         | 1.40  | 15.30 | 1.99 | 5.01  | 3.88  | 10.59 | 0.85  | 6.53  | 1.66  | 3.58   | 2.12  | 0.20    |
| A375      | Viability % | 82.43 | 84.43 | 0.73 | 1.59  | 0.70  | 88.96 | 71.66 | 98.97 | 73.45 | 101.48 | 81.57 | 100.00  |
|           | STD         | 1.90  | 2.57  | 0.27 | 0.53  | 1.02  | 3.60  | 2.15  | 2.14  | 1.03  | 6.67   | 10.71 | 0.40    |
| NCI-H1573 | Viability % | 29.16 |       | 7.22 | 12.14 | 10.05 | 89.79 | 33.77 |       | 20.34 | 91.88  | 81.84 | 100.00  |
|           | STD         | 5.26  |       | 0.39 | 0.99  | 3.45  | 8.11  | 5.10  |       | 2.08  | 2.85   | 5.78  | 0.30    |

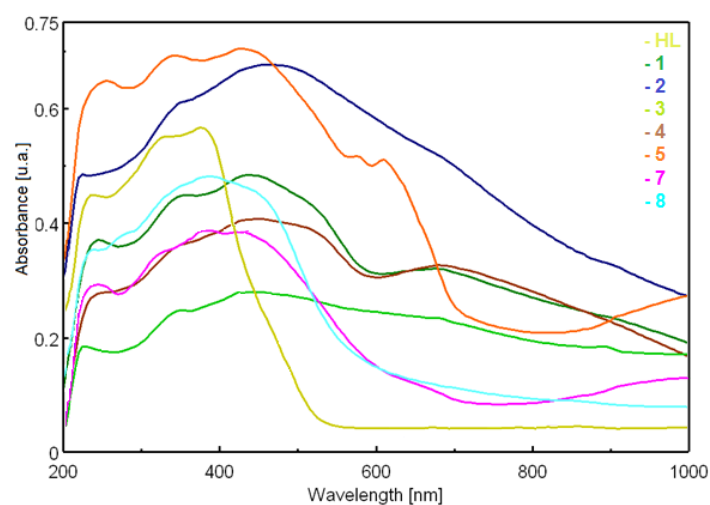

**Figure S1.** Electronic spectra of the ligands **HL** and metal complexes **1 – 5, 7, 8**.

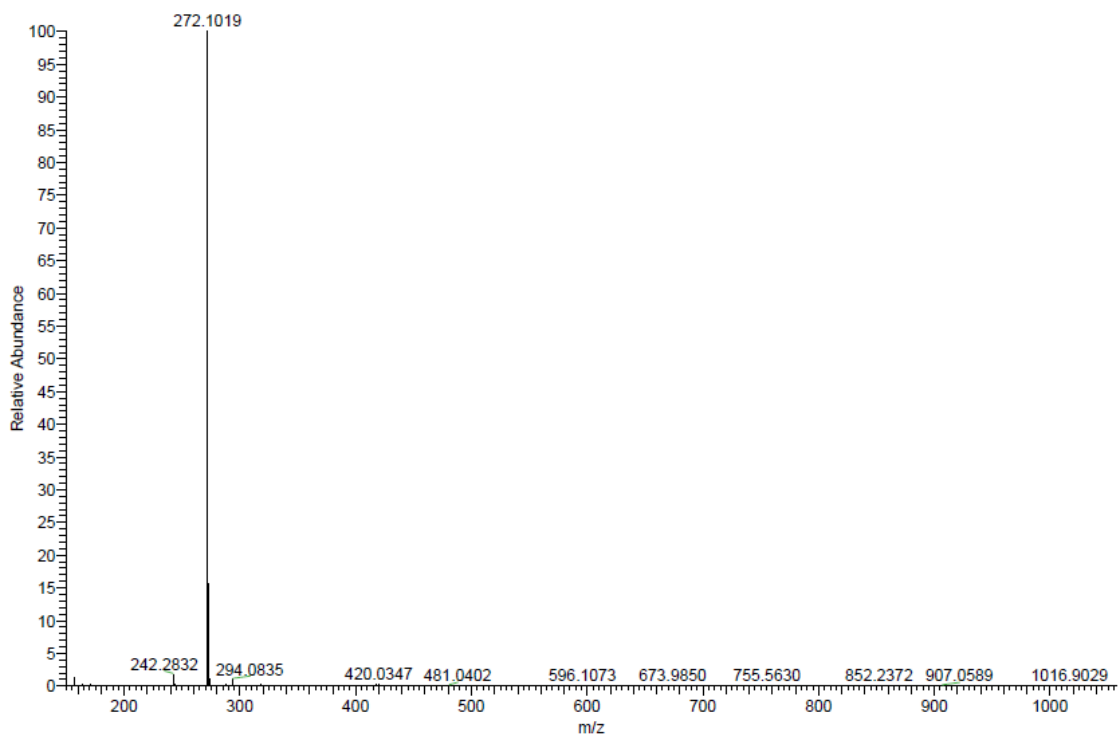

**Figure S2.** Mass spectrum of ligand **HL**

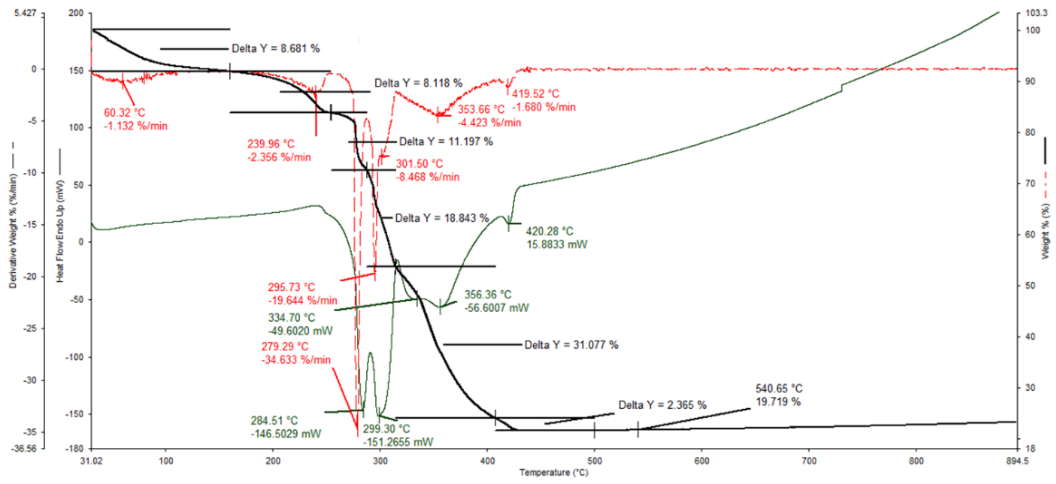

(a)

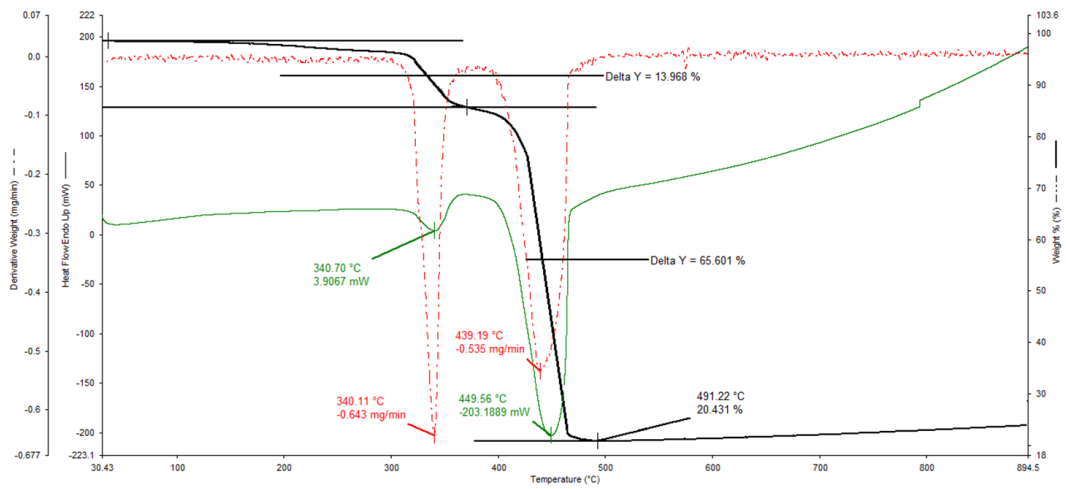

(b)

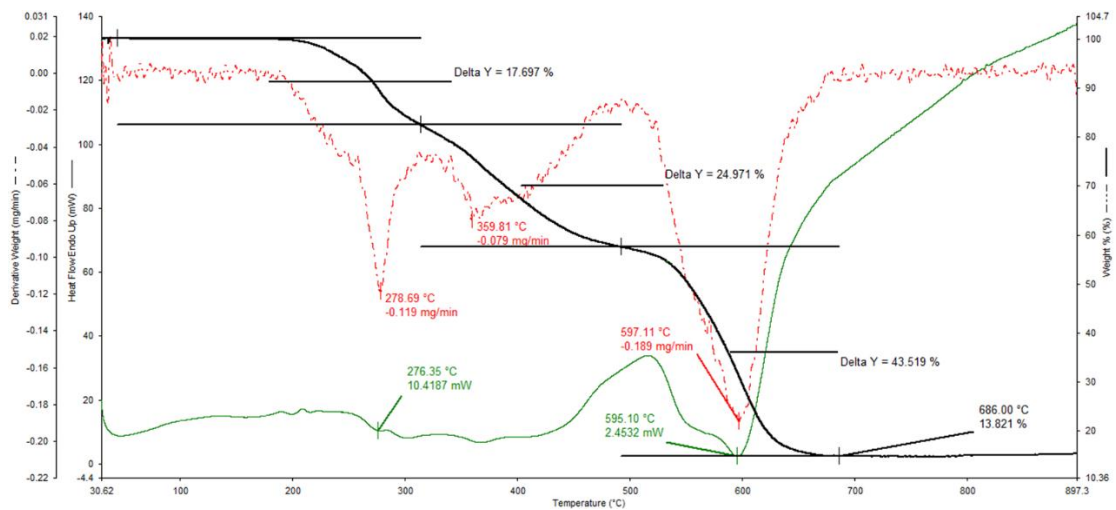

(c)

Figure S3. Thermogravimetric analysis of complexes (a)1, (b)2 and (c)6.

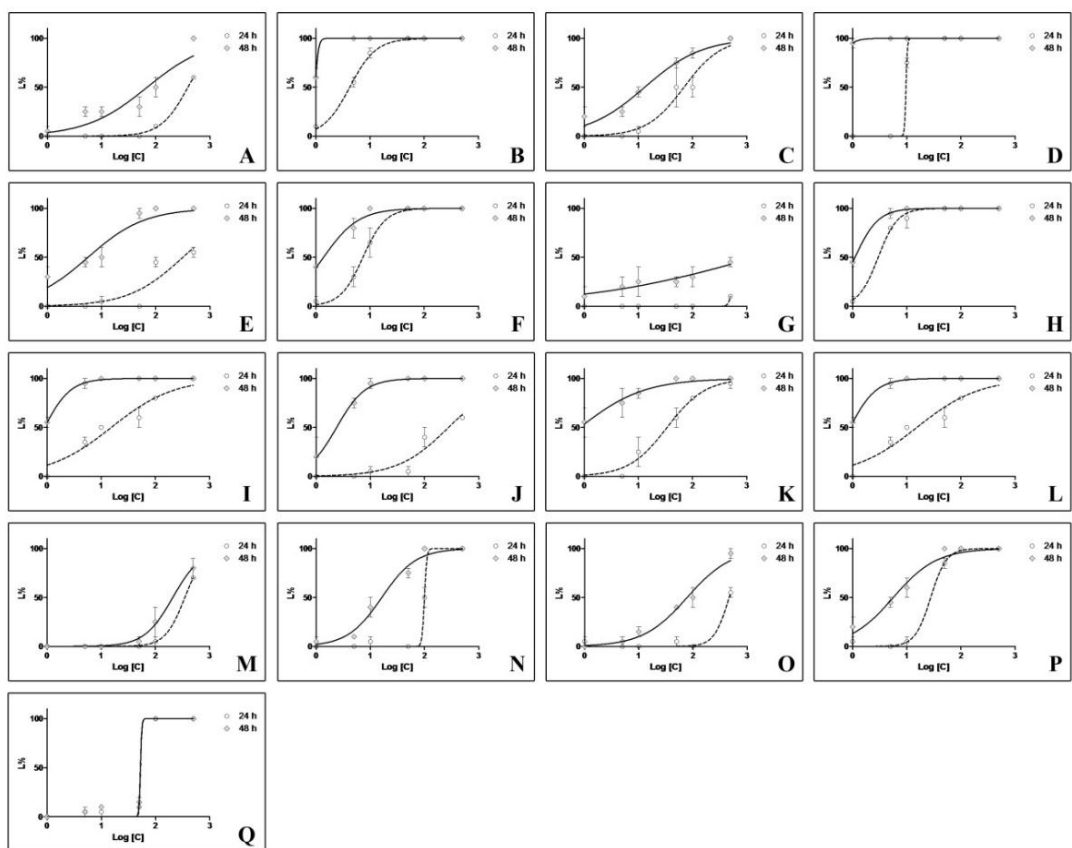

**Figure S4.** Concentration-lethality curves for toxicity assessment on *Daphnia magna* of (A) 1, (B)  $\text{CuCl}_2$ , (C) 2, (D)  $\text{Cu}(\text{CH}_3\text{COO})_2$ , (E) 3, (F)  $\text{Cu}(\text{NO}_3)_2$ , (G) 4, (H)  $\text{Cu}(\text{ClO}_4)_2$ , (I) 5, (J)  $\text{CoCl}_2$ , (K) 6, (L)  $\text{ZnCl}_2$ , (M) 7, (N)  $\text{NiCl}_2$ , (O) 8, (P)  $\text{K}_2\text{PtCl}_4$  and (Q) HL.
